FALL 2021 | VOLUME 19 | NUMBER 4

# Focus

The Journal of Lifelong Learning in Psychiatry

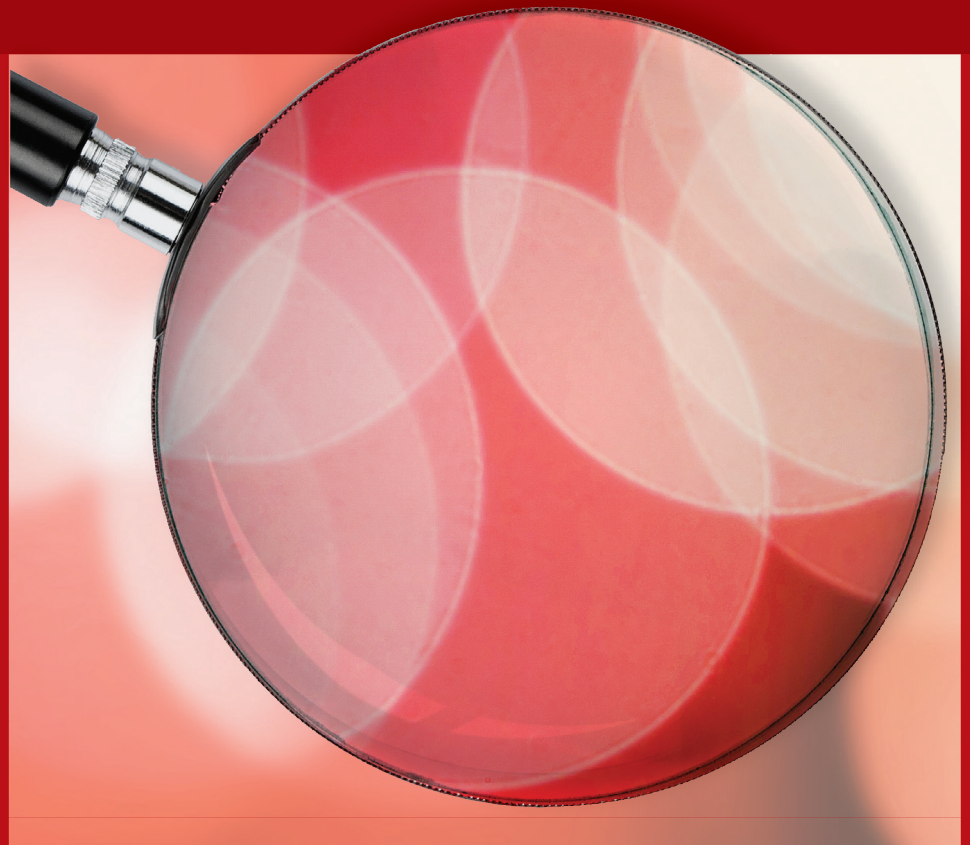

## Diagnosis and Treatment of Obsessive-Compulsive and Related Disorders

Guest Editor: Michele T. Pato, M.D.

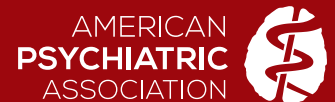

[focus.psychiatryonline.org](http://focus.psychiatryonline.org)
